# Supplementary material for: Study on Thermal Conductivity and Mechanical Properties of Cyclotriphosphazene Resin-Forced Epoxy Resin Composites
Source: MDPI journal article supplement (doi:10.3390/cryst13030478), 2023-03-10
Supplement: s1 [file s1]

# Study on Thermal Conductivity and Mechanical Properties of Cyclotriphosphazene Resin-Forced Epoxy Resin Composites

Omar Dagdag <sup>1,\*</sup>, Lahoucine El Gana <sup>2</sup>, Rajesh Haldhar <sup>3,\*</sup>, Avni Berisha <sup>4</sup>, Seong-Cheol Kim <sup>3,\*</sup>, Elyor Berdimurodov <sup>5</sup>, Othman Hamed <sup>6</sup>, Shehdeh Jodeh <sup>6</sup>, Ekemini Daniel Akpan <sup>1</sup> and Eno Effiong Ebenso <sup>1,\*</sup>

<sup>1</sup> Centre for Materials Science, College of Science, Engineering, and Technology, University of South Africa, Johannesburg 1710, South Africa

<sup>2</sup> Laboratory of Materials Physics and Subatomic, Department of Physics, Faculty of Sciences, Ibn Tofail University, BP 133, Kenitra 14000, Morocco

<sup>3</sup> School of Chemical Engineering, Yeungnam University, Gyeongsan 38541, Republic of Korea

<sup>4</sup> Department of Chemistry, Faculty of Natural and Mathematics Science, University of Prishtina, 10000 Prishtina, Kosovo

<sup>5</sup> Faculty of Chemistry, National University of Uzbekistan, Tashkent 100034, Uzbekistan

<sup>6</sup> Department of Chemistry, An-Najah National University, Nablus P.O. Box 7, Palestine

\* Correspondence: dagdao@unisa.ac.za (O.D.); rajeshhaldhar@yu.ac.kr (R.H.); sckim07@ynu.ac.kr (S.-C.K.); ebensee@unisa.ac.za (E.E.E.)

## Supplementary information

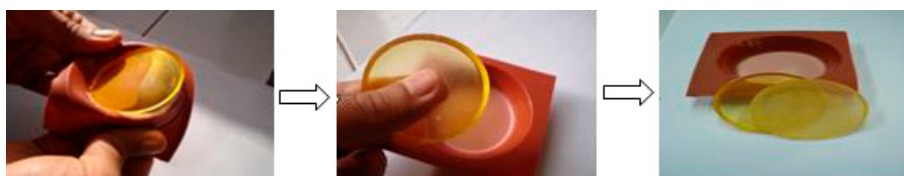

**Figure S1.** A samples preparation procedure [26].

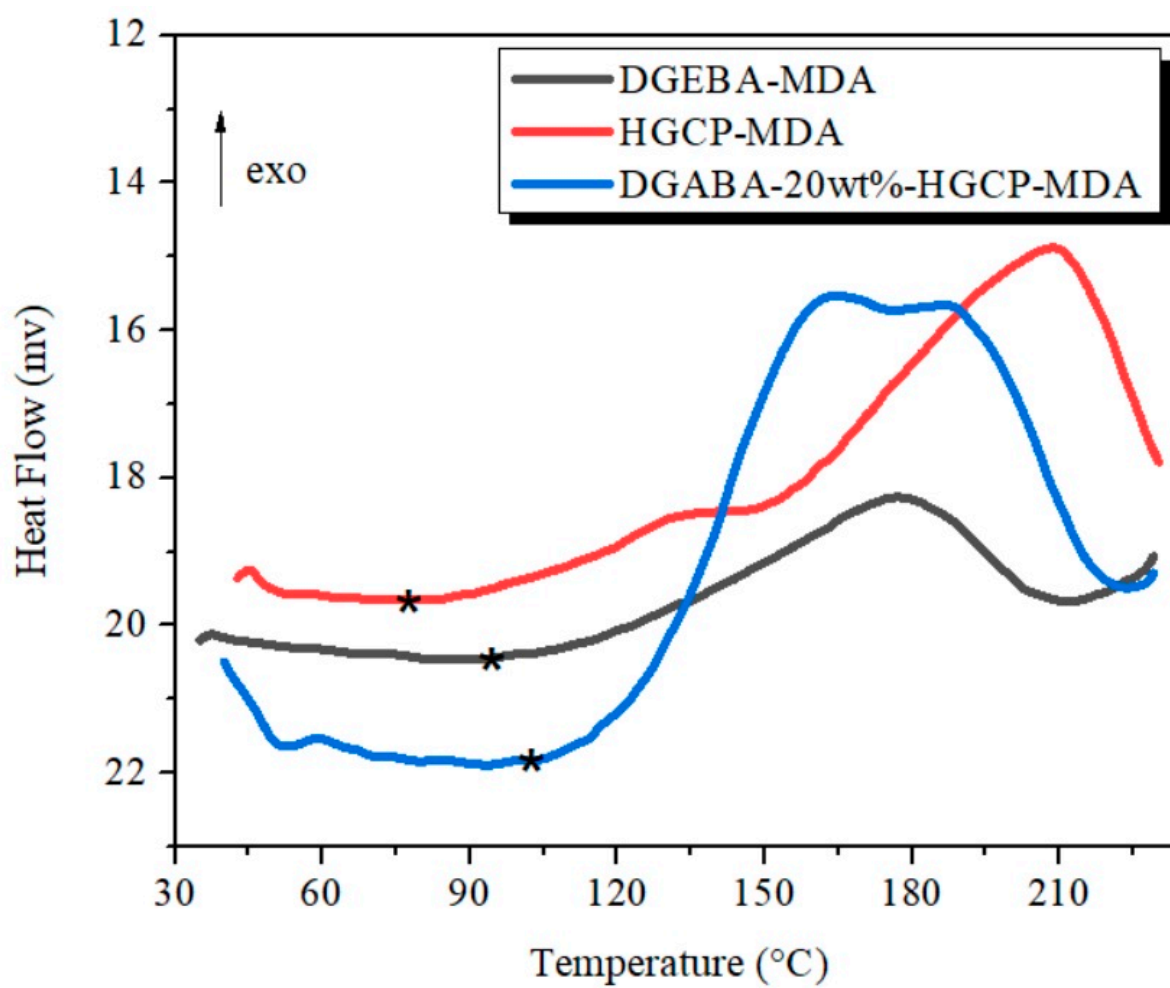

**Figure S2.** DSC thermograms of materials DGEBA@MDA, HGCP@MDA and DGEBA@HGCP20%@MDA [24].

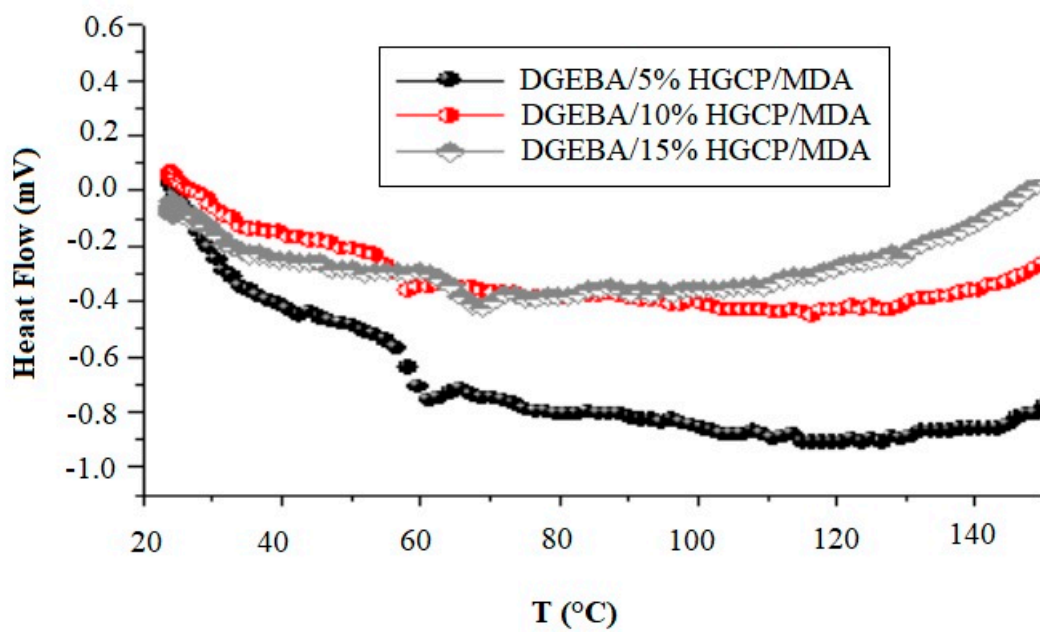

**Figure S3.** DSC thermograms of materials DGEBA@HGCP5%@MDA, DGEBA@HGCP10%@MDA and DGEBA@HGCP15%@MDA [37].
